# Supplementary material for: Cohesive versus Flexible Evolution of Functional Modules in Eukaryotes
Source: PubMed Central journal article supplement (PMC2615111; doi:10.1371/journal.pcbi.1000276), 2009-01-30
Supplement: pcbi.1000276.s005.pdf [file pcbi.1000276.s005.pdf]

## **Supplementary Examples**

'Cohesive versus flexible evolution of functional modules in Eukaryotes'  
Like Fokkens and Berend Snel

## TABLE OF CONTENTS

|                                                                    |    |
|--------------------------------------------------------------------|----|
| E1: A flexibly evolving complex: Nup84 complex (Aloy) .....        | 3  |
| E2: A flexibly evolving complex: NPS1 complex (MIPS) .....         | 6  |
| E3: A cohesively evolving complex: TFIIH complex (MIPS) .....      | 9  |
| E4: A cohesively evolving pathway: Valine biosynthesis (SGD) ..... | 12 |
| E5: A flexibly evolving pathway: Valine degradation (SGD) .....    | 14 |
| References .....                                                   | 16 |

Supplementary Material S1-S6 is available in a separate .pdf file.

S7 (Overrepresented Gene Ontology Biological Process categories), S8 (Overrepresented Gene Ontology Molecular Function categories) and S9 (Overrepresented Gene Ontology Cellular Component categories) are available in separate excel files.

Fasta files with protein sequences, tab files of KOGs, orthoMCL groups and the functional modules which are used in this study are available for download at [bioinformatics.bio.uu.nl/like/suppl/](http://bioinformatics.bio.uu.nl/like/suppl/)

## E1: A flexibly evolving complex: Nup84 complex (Aloy)

### Description:

The Nup84 complex, defined in the Aloy dataset, is a subcomplex of the Nuclear Pore Complex (NPC) and consists of 5 nucleoporins and a COPII coat complex subunit. It is involved in the nuclear export of mRNA and plays an important role in the biogenesis of the Nuclear Pore Complex.

### Subunits:

| ORF     | gene name | annotation                                                                                                                                                                                                                                      | KOG     |
|---------|-----------|-------------------------------------------------------------------------------------------------------------------------------------------------------------------------------------------------------------------------------------------------|---------|
| YGL092W | NUP145    | Essential nucleoporin, catalyzes its own cleavage in vivo to generate a C-terminal fragment that assembles into the Nup84p subcomplex of the nuclear pore complex, and an N-terminal fragment of unknown function that is homologous to Nup100p | KOG0845 |
| YLR208W | SEC13     | Component of both the Nup84 nuclear pore sub-complex and of the COPII complex (Sar1p, Sec13p, Sec16p, Sec23p, Sec24p, Sec31p, Sfb2p, and Sfb3p) which is important for the formation of ER to Golgi transport vesicles                          | KOG1332 |
| YDL116W | NUP84     | Subunit of the nuclear pore complex (NPC), forms a subcomplex with Nup85p, Nup120p, Nup145p-C, Sec13p, and Seh1p that plays a role in nuclear mRNA export and NPC biogenesis                                                                    | KOG1964 |
| YGL100W | SEH1      | Nuclear pore protein that is part of the evolutionarily conserved Nup84p complex (Nup84p, Nup85p, Nup120p, Nup145p, and Seh1p); homologous to Sec13p                                                                                            | KOG2445 |
| YJR042W | NUP85     | Subunit of the Nup84p subcomplex of the nuclear pore complex (NPC), required for assembly of the subcomplex and also for formation of the nucleocytoplasmic Gsp1p concentration gradient that plays a role in nuclear trafficking               | KOG2271 |
| YKL057C | NUP120    | Subunit of the Nup84p subcomplex of the nuclear pore complex (NPC), required for even distribution of NPCs around the nuclear envelope, involved in establishment of a normal nucleocytoplasmic concentration gradient of the GTPase Gsp1p      | KOG8539 |

(annotation from the *Saccharomyces* Genome Database)

### Profile:

| KOG     | <i>G. lambia</i> | <i>L. major</i> | <i>P. falciparum</i> | <i>T. parvum</i> | <i>C. parvum</i> | <i>O. tauri</i> | <i>C. merolae</i> | <i>A. thaliana</i> | <i>O. sativa</i> | <i>E. cuniculi</i> | <i>R. oryzae</i> | <i>C. neoformans</i> | <i>U. maydis</i> | <i>S. pombe</i> | <i>Y. lipolytica</i> | <i>C. guilliermondii</i> | <i>D. hansenii</i> | <i>C. glabrata</i> | <i>S. cerevisiae</i> | <i>K. lactis</i> | <i>E. gossypii</i> | <i>F. graminearum</i> | <i>N. crassa</i> | <i>S. sclerotiorum</i> | <i>C. immitis</i> | <i>A. nidulans</i> | <i>A. terreus</i> | <i>A. fumigatus</i> | <i>C. elegans</i> | <i>D. melanogaster</i> | <i>H. sapiens</i> | <i>M. musculus</i> | <i>D. discoideum</i> | <i>E. histolytica</i> |
|---------|------------------|-----------------|----------------------|------------------|------------------|-----------------|-------------------|--------------------|------------------|--------------------|------------------|----------------------|------------------|-----------------|----------------------|--------------------------|--------------------|--------------------|----------------------|------------------|--------------------|-----------------------|------------------|------------------------|-------------------|--------------------|-------------------|---------------------|-------------------|------------------------|-------------------|--------------------|----------------------|-----------------------|
| KOG0845 | 1                | 4               | 1                    | 2                | 3                | 2               | 2                 | 5                  | 20               | 3                  | 3                | 2                    | 2                | 4               | 4                    | 3                        | 6                  | 7                  | 11                   | 8                | 3                  | 3                     | 2                | 3                      | 4                 | 3                  | 3                 | 2                   | 5                 | 3                      | 3                 | 2                  | 1                    | 1                     |
| KOG1332 | 1                | 2               | 1                    | 1                | 1                | 1               | 1                 | 2                  | 3                | 1                  | 1                | 1                    | 1                | 1               | 1                    | 1                        | 1                  | 2                  | 1                    | 1                | 1                  | 1                     | 1                | 1                      | 1                 | 1                  | 1                 | 1                   | 1                 | 1                      | 1                 | 1                  | 1                    | 1                     |
| KOG1964 | 1                | 1               | 1                    | 1                | 1                | 1               | 1                 | 1                  | 1                | 1                  | 1                | 1                    | 1                | 1               | 1                    | 1                        | 1                  | 1                  | 1                    | 1                | 1                  | 1                     | 1                | 1                      | 1                 | 1                  | 1                 | 1                   | 1                 | 1                      | 1                 | 1                  | 1                    | 1                     |
| KOG2445 | 1                | 1               | 1                    | 1                | 1                | 1               | 1                 | 1                  | 1                | 1                  | 1                | 1                    | 1                | 1               | 1                    | 1                        | 1                  | 1                  | 1                    | 1                | 1                  | 1                     | 1                | 1                      | 1                 | 1                  | 1                 | 1                   | 1                 | 1                      | 1                 | 1                  | 1                    | 1                     |
| KOG2271 | 1                | 1               | 1                    | 1                | 1                | 1               | 1                 | 1                  | 1                | 1                  | 1                | 1                    | 1                | 1               | 1                    | 1                        | 1                  | 1                  | 1                    | 1                | 1                  | 1                     | 1                | 1                      | 1                 | 1                  | 1                 | 1                   | 1                 | 1                      | 1                 | 1                  | 1                    | 1                     |
| KOG8539 | 1                | 1               | 1                    | 1                | 1                | 1               | 1                 | 1                  | 1                | 1                  | 1                | 1                    | 1                | 1               | 1                    | 1                        | 1                  | 1                  | 1                    | 1                | 1                  | 1                     | 1                | 1                      | 1                 | 1                  | 1                 | 1                   | 1                 | 1                      | 1                 | 1                  | 1                    | 1                     |

### Cohesiveness Scores:

|                                 | Scores | raw  | compared to background |
|---------------------------------|--------|------|------------------------|
| Avg Co-occurrence               |        | 0.62 | 0.37                   |
| Avg Deviation From Modular      |        | 0.23 | 0.41                   |
| Homogeneous Columns             |        | 5    | 0.4                    |
| Species Absent                  |        | 0    | 0                      |
| Species Present                 |        | 5    | 0.48                   |
| Species Present, Species Absent | (5, 0) |      | 0.48                   |

Cohesiveness scores for different measures. Species Present, Species Absent is the score used throughout the article. Raw scores are compared to 100000 random modules of the same size, cohesiveness scores for each raw scores are obtained by counting the number of random modules with a better raw score (or in case of a multidimensional method: better raw scores) and dividing that number by 100000.

## Filters:

### Cross-comparison of module datasets

This complex occurs in the MIPS dataset as 'Nup84 complex' and in the two high-throughput datasets. The PE clusters dataset contains a module with these components plus two additional subunits: MTR2 and MEX67 which together form a RNA binding mRNA export complex. These two proteins are known to bind the assembled Nup84 complex (Yao et al. 2008). This larger complex has the same raw score and a higher cohesiveness score: 0.59.

The socio-affinity clusters dataset contains a 'Nup84 sub-complex' which consists of all components of the Aloy and MIPS Nup84 complex and has 9 additional subunits: two 'modules' associated with ER to Golgi transport and COPII vesicles (a module consisting of SEC16, SEC23 and SFB2 and a module consisting of SEC24 and GRH1), SEC31, ERO1: a thiol oxidase required for oxidative protein folding in the endoplasmic reticulum, STT3: a subunit of the oligosaccharyltransferase complex of the ER lumen, which catalyzes asparagine-linked glycosylation of newly synthesized proteins and CYS4: a cystathionine beta-synthase, which catalyzes the synthesis of cystathionine from serine and homocysteine. The 'core' complex of this socio-affinity cluster is exactly the same as the Aloy and MIPS Nup84 complex. (For a more detailed explanation of Complexes, Cores and Modules in the socio-affinity dataset, we refer to Gavin et al. 2006). This socio-affinity cluster has a raw score (5,0) like the Aloy Nup84 complex, but a higher cohesiveness score (0.85) due to its large size.

### Filtering with Purification Enrichment scores:

|        | NUP145 | SEC13 | NUP84 | SEH1 | NUP85 | NUP120 |
|--------|--------|-------|-------|------|-------|--------|
| NUP145 |        | 6.5   | 9.8   | 7.1  | 6.8   | 9.4    |
| SEC13  | 6.5    |       | 5.8   | 6.7  | 5.0   | 4.6    |
| NUP84  | 9.8    | 5.8   |       | 6.4  | 6.8   | 9.4    |
| SEH1   | 7.1    | 6.7   | 6.4   |      | 4.3   | 6.7    |
| NUP85  | 6.8    | 5.0   | 6.8   | 4.3  |       | 4.9    |
| NUP120 | 9.4    | 4.6   | 9.4   | 6.7  | 4.9   |        |

We first remove all components with a zero PE score with all other components and cluster the components with single linkage with  $-1 * PE$  score as distance, we obtain two clusters and remove the smallest cluster. The first step does not apply to any of the module constituents, the second step results in removing SEC13 from the module.

Resulting profile:

| KOG     | <i>G. lamblia</i> | <i>L. major</i> | <i>P. falciparum</i> | <i>T. parvum</i> | <i>C. parvum</i> | <i>O. tauri</i> | <i>C. merolae</i> | <i>A. thaliana</i> | <i>O. sativa</i> | <i>E. cucullii</i> | <i>R. oryzae</i> | <i>C. neoformans</i> | <i>U. maydis</i> | <i>S. pombe</i> | <i>Y. lipolytica</i> | <i>C. guilliermondii</i> | <i>D. hansenii</i> | <i>C. glabrata</i> | <i>S. cerevisiae</i> | <i>K. lactis</i> | <i>E. gossypii</i> | <i>F. graminearum</i> | <i>N. crassa</i> | <i>S. sclerotiorum</i> | <i>C. immitis</i> | <i>A. nidulans</i> | <i>A. terreus</i> | <i>A. fumigatus</i> | <i>C. elegans</i> | <i>D. melanogaster</i> | <i>H. sapiens</i> | <i>M. musculus</i> | <i>D. discoideum</i> | <i>E. histolytica</i> |  |
|---------|-------------------|-----------------|----------------------|------------------|------------------|-----------------|-------------------|--------------------|------------------|--------------------|------------------|----------------------|------------------|-----------------|----------------------|--------------------------|--------------------|--------------------|----------------------|------------------|--------------------|-----------------------|------------------|------------------------|-------------------|--------------------|-------------------|---------------------|-------------------|------------------------|-------------------|--------------------|----------------------|-----------------------|--|
| KOG0845 | 1                 | 4               | 1                    | 2                | 3                | 2               | 2                 | 5                  | 20               | 3                  | 3                | 2                    | 2                | 4               | 4                    | 3                        | 5                  | 7                  | 11                   | 8                | 3                  | 3                     | 2                | 3                      | 4                 | 3                  | 3                 | 2                   | 5                 | 3                      | 3                 | 2                  | 1                    | 1                     |  |
| KOG1964 |                   |                 |                      |                  |                  |                 |                   |                    |                  |                    |                  |                      |                  |                 |                      |                          |                    |                    |                      |                  |                    |                       |                  |                        |                   |                    |                   |                     |                   |                        |                   |                    |                      |                       |  |
| KOG2445 |                   |                 |                      |                  |                  |                 |                   |                    |                  |                    |                  |                      |                  |                 |                      |                          |                    |                    |                      |                  |                    |                       |                  |                        |                   |                    |                   |                     |                   |                        |                   |                    |                      |                       |  |
| KOG2271 |                   |                 |                      |                  |                  |                 |                   |                    |                  |                    |                  |                      |                  |                 |                      |                          |                    |                    |                      |                  |                    |                       |                  |                        |                   |                    |                   |                     |                   |                        |                   |                    |                      |                       |  |
| KOG8539 |                   |                 |                      |                  |                  |                 |                   |                    |                  |                    |                  |                      |                  |                 |                      |                          |                    |                    |                      |                  |                    |                       |                  |                        |                   |                    |                   |                     |                   |                        |                   |                    |                      |                       |  |

The resulting submodule has the same raw score (5,0) and lower cohesiveness score than the original module (0.41) (the distribution of scores of random modules becomes more dispersed as the number of subunits decreases). An other way of filtering with TAP data is to remove those subunits which are more likely to interact with a protein which is not in the module. In this example, SEC13 also fits this criterion: it is most likely to interact with SEC31, which is a component of the COPII coat of secretory pathway vesicles.

### Trusted KOGs

We compare our KOG-based orthologous groups with ones obtained with the orthoMCL program and trust only those KOGs who have at least 90% overlap with an orthoMCL orthologous group. This filter removes all orthologous groups except KOG1332 and KOG2445, which results in the following profile:

| KOG     | <i>G. lamblia</i> | <i>L. major</i> | <i>P. falciparum</i> | <i>T. parvum</i> | <i>C. parvum</i> | <i>O. tauri</i> | <i>C. merolae</i> | <i>A. thaliana</i> | <i>O. sativa</i> | <i>E. cucullii</i> | <i>R. oryzae</i> | <i>C. neoformans</i> | <i>U. maydis</i> | <i>S. pombe</i> | <i>Y. lipolytica</i> | <i>C. guilliermondii</i> | <i>D. hansenii</i> | <i>C. glabrata</i> | <i>S. cerevisiae</i> | <i>K. lactis</i> | <i>E. gossypii</i> | <i>F. graminearum</i> | <i>N. crassa</i> | <i>S. sclerotiorum</i> | <i>C. immitis</i> | <i>A. nidulans</i> | <i>A. terreus</i> | <i>A. fumigatus</i> | <i>C. elegans</i> | <i>D. melanogaster</i> | <i>H. sapiens</i> | <i>M. musculus</i> | <i>D. discoideum</i> | <i>E. histolytica</i> |  |  |
|---------|-------------------|-----------------|----------------------|------------------|------------------|-----------------|-------------------|--------------------|------------------|--------------------|------------------|----------------------|------------------|-----------------|----------------------|--------------------------|--------------------|--------------------|----------------------|------------------|--------------------|-----------------------|------------------|------------------------|-------------------|--------------------|-------------------|---------------------|-------------------|------------------------|-------------------|--------------------|----------------------|-----------------------|--|--|
| KOG1332 |                   |                 |                      |                  |                  |                 |                   |                    |                  |                    |                  |                      |                  |                 |                      |                          |                    |                    |                      |                  |                    |                       |                  |                        |                   |                    |                   |                     |                   |                        |                   |                    |                      |                       |  |  |
| KOG2445 |                   |                 |                      |                  |                  |                 |                   |                    |                  |                    |                  |                      |                  |                 |                      |                          |                    |                    |                      |                  |                    |                       |                  |                        |                   |                    |                   |                     |                   |                        |                   |                    |                      |                       |  |  |

This submodule has a raw score (24,2) and an increased cohesiveness score of 0.87.



## E2: A flexibly evolving complex: NPS1 complex (MIPS)

### Description:

The NSP1 complex, defined in the MIPS dataset is a subcomplex of the Nuclear Pore Complex (NPC), a large complex which spans the nuclear envelope and enables bidirectional nucleocytoplasmic transport. It is composed of four subunits, of which the NIC96 subunit is embedded in the NPC and is connected to the NUP49-NUP57-NIC96 heterotrimer via its N terminal coiled coil domain (Schrader et al. 2008, Grandi et al. 1995). The translocation through the NPC relies on the interaction of these transport receptors with the FG repeats which protrude from the NUP49-NUP57-NIC96 heterotrimer into the central pore channel. There are multiple copies of this subcomplex residing in the NPC.

### Subunits:

| ORF     | gene name | annotation                                                                                                                                                             | KOG                |
|---------|-----------|------------------------------------------------------------------------------------------------------------------------------------------------------------------------|--------------------|
| YFR002W | NIC96     | Component of the nuclear pore complex, required for nuclear pore formation; forms a subcomplex with Nsp1p, Nup57p, and Nup49p                                          | KOG2168            |
| YJL041W | NSP1      | Essential component of the nuclear pore complex, which mediates nuclear import and export                                                                              | KOG4719<br>KOG2196 |
| YGL172W | NUP49     | Subunit of the Nsp1p-Nup57p-Nup49p-Nic96p subcomplex of the nuclear pore complex (NPC), required for nuclear export of ribosomes                                       | KOG0845            |
| YGR119C | NUP57     | Nucleoporin, essential subunit of the nuclear pore complex (NPC), functions as the organizing center of an NPC subcomplex containing Nsp1p, Nup49p, Nup57p, and Nic96p | KOG3091            |

(annotation from the *Saccharomyces* Genome Database)

### Profile:

| KOG     | <i>G. lambia</i> | <i>L. major</i> | <i>P. falciparum</i> | <i>T. parvum</i> | <i>C. parvum</i> | <i>O. tauri</i> | <i>C. merolae</i> | <i>A. thaliana</i> | <i>O. sativa</i> | <i>E. cuciculi</i> | <i>R. oryzae</i> | <i>C. neobormans</i> | <i>U. maydis</i> | <i>S. pombe</i> | <i>Y. lipolytica</i> | <i>C. guilliermondii</i> | <i>D. hansenii</i> | <i>C. glabrata</i> | <i>S. cerevisiae</i> | <i>K. lactis</i> | <i>E. gossypii</i> | <i>F. graminearum</i> | <i>N. crassa</i> | <i>S. sclerotiorum</i> | <i>C. immitis</i> | <i>A. nidulans</i> | <i>A. terreus</i> | <i>A. fumigatus</i> | <i>C. elegans</i> | <i>D. melanogaster</i> | <i>H. sapiens</i> | <i>M. musculus</i> | <i>D. discoideum</i> | <i>E. histolytica</i> |   |
|---------|------------------|-----------------|----------------------|------------------|------------------|-----------------|-------------------|--------------------|------------------|--------------------|------------------|----------------------|------------------|-----------------|----------------------|--------------------------|--------------------|--------------------|----------------------|------------------|--------------------|-----------------------|------------------|------------------------|-------------------|--------------------|-------------------|---------------------|-------------------|------------------------|-------------------|--------------------|----------------------|-----------------------|---|
| KOG2168 | 1                | 1               | 1                    | 1                | 1                | 1               | 1                 | 1                  | 1                | 1                  | 1                | 1                    | 1                | 1               | 1                    | 1                        | 1                  | 1                  | 1                    | 1                | 1                  | 1                     | 1                | 1                      | 1                 | 1                  | 1                 | 1                   | 1                 | 1                      | 1                 | 1                  | 1                    | 1                     | 1 |
| KOG4719 | 1                | 1               | 1                    | 1                | 1                | 1               | 1                 | 1                  | 1                | 1                  | 1                | 1                    | 1                | 1               | 1                    | 1                        | 1                  | 1                  | 1                    | 1                | 1                  | 1                     | 1                | 1                      | 1                 | 1                  | 1                 | 1                   | 1                 | 1                      | 1                 | 1                  | 1                    | 1                     | 1 |
| KOG2196 | 3                | 1               | 1                    | 1                | 1                | 1               | 1                 | 1                  | 1                | 1                  | 1                | 1                    | 1                | 1               | 1                    | 1                        | 1                  | 1                  | 1                    | 1                | 1                  | 1                     | 1                | 1                      | 1                 | 1                  | 1                 | 1                   | 1                 | 1                      | 1                 | 1                  | 1                    | 1                     | 1 |
| KOG0845 | 1                | 4               | 1                    | 2                | 3                | 2               | 1                 | 5                  | 20               | 3                  | 3                | 2                    | 2                | 4               | 4                    | 3                        | 6                  | 7                  | 11                   | 8                | 3                  | 3                     | 2                | 3                      | 4                 | 3                  | 3                 | 2                   | 5                 | 3                      | 3                 | 2                  | 1                    | 1                     | 1 |
| KOG3091 | 1                | 1               | 1                    | 1                | 1                | 1               | 1                 | 1                  | 1                | 1                  | 1                | 1                    | 1                | 1               | 1                    | 1                        | 1                  | 1                  | 1                    | 1                | 1                  | 1                     | 1                | 1                      | 1                 | 1                  | 1                 | 1                   | 1                 | 1                      | 1                 | 1                  | 1                    | 1                     | 1 |

### Cohesiveness Scores:

| Scores                          | raw     | compared to background |
|---------------------------------|---------|------------------------|
| Avg Co-occurrence               | 0.78    | 0.78                   |
| Avg Deviation From Modular      | 0.14    | 0.77                   |
| Homogeneous Columns             | 19      | 0.78                   |
| Species Absent                  | 0       | 0                      |
| Species Present                 | 19      | 0.8                    |
| Species Present, Species Absent | (19, 0) | 0.797                  |

Cohesiveness scores for different measures. Species Present, Species Absent is the score used throughout the article. Raw scores are compared to 100000 random modules of the same size, cohesiveness scores for each raw scores are obtained by counting the number of random modules with a better raw score (or in case of a multidimensional method: better raw scores) and dividing that number by 100000.

### Filters:

#### Cross-comparison of module datasets

This complex occurs also in the Aloy dataset as 'Nps1 subcomplex of the nuclear pore complex' and passes the cross-comparison filter without losing any subunits.

|       | NIC96 | NSP1 | NUP49 | NUP57 |
|-------|-------|------|-------|-------|
| NIC96 |       | 7.3  | 5.6   | 4.6   |
| NSP1  | 7.3   |      | 4.6   | 5.7   |
| NUP49 | 5.6   | 4.6  |       | 4.8   |
| NUP57 | 4.6   | 5.7  | 4.8   |       |

#### Filtering with Purification Enrichment scores:

We first remove all components with a zero PE score with all other components and cluster the components with single linkage with  $-1 \times$  PE score as distance, we obtain two clusters and remove the smallest cluster. The first step does not apply to any of the module constituents, the second step results in removing NUP49 from the module.

Resulting profile:

| KOG     | <i>G. lambia</i> | <i>L. major</i> | <i>P. falciparum</i> | <i>T. parvum</i> | <i>C. parvum</i> | <i>O. tauri</i> | <i>C. merolae</i> | <i>A. thaliana</i> | <i>O. sativa</i> | <i>E. cuniculi</i> | <i>R. oryzae</i> | <i>C. neoformans</i> | <i>U. maydis</i> | <i>S. pombe</i> | <i>Y. lipolytica</i> | <i>C. guilliermondii</i> | <i>D. hansenii</i> | <i>C. glabrata</i> | <i>S. cerevisiae</i> | <i>K.lactis</i> | <i>E. gossypii</i> | <i>F. graminearum</i> | <i>N. crassa</i> | <i>S. sclerotiorum</i> | <i>C. immitis</i> | <i>A. nidulans</i> | <i>A. terreus</i> | <i>A. fumigatus</i> | <i>C. elegans</i> | <i>D. melanogaster</i> | <i>H. sapiens</i> | <i>M. musculus</i> | <i>D. discoideum</i> | <i>E. histolytica</i> |   |   |   |
|---------|------------------|-----------------|----------------------|------------------|------------------|-----------------|-------------------|--------------------|------------------|--------------------|------------------|----------------------|------------------|-----------------|----------------------|--------------------------|--------------------|--------------------|----------------------|-----------------|--------------------|-----------------------|------------------|------------------------|-------------------|--------------------|-------------------|---------------------|-------------------|------------------------|-------------------|--------------------|----------------------|-----------------------|---|---|---|
| KOG2168 | 1                |                 |                      |                  |                  |                 | 1                 | 2                  | 1                |                    | 2                | 1                    | 1                | 1               | 1                    | 1                        | 1                  | 1                  | 1                    | 1               | 1                  | 1                     | 1                | 1                      | 1                 | 1                  | 1                 | 1                   | 1                 | 1                      | 1                 | 1                  | 1                    | 1                     | 1 | 1 |   |
| KOG4719 | 1                |                 |                      |                  |                  | 1               |                   |                    |                  |                    | 1                | 1                    | 1                | 1               | 1                    | 1                        | 1                  | 1                  | 1                    | 1               | 1                  | 1                     | 1                | 1                      | 1                 |                    |                   |                     | 1                 | 2                      | 1                 | 1                  | 1                    | 1                     | 1 | 1 |   |
| KOG2196 | 3                | 1               | 1                    | 1                | 1                |                 | 1                 | 1                  | 1                |                    | 1                | 1                    | 1                | 1               | 1                    | 1                        | 1                  | 1                  | 1                    | 1               | 1                  | 1                     | 1                | 1                      | 1                 | 1                  | 1                 | 1                   | 1                 | 1                      | 1                 | 1                  | 1                    | 1                     | 1 | 1 | 1 |
| KOG3091 | 1                |                 |                      |                  |                  |                 | 1                 |                    |                  |                    | 2                | 2                    | 1                | 1               | 2                    | 1                        | 1                  | 1                  | 1                    | 1               | 1                  | 1                     | 1                | 1                      | 1                 | 1                  | 1                 | 1                   | 1                 | 1                      | 1                 | 1                  | 1                    | 1                     | 1 | 1 | 1 |

The resulting submodule has a better raw score (19,2) and a higher cohesiveness score than the original module (0.97). An other way of filtering with TAP data is to remove those subunits which are more likely to interact with a protein which is not in the module. This results in removing NSP1, which has the highest PE score (15.1) with NUP82, a nucleoporin and subunit of the Nuclear Pore Complex which forms a subcomplex with NSP1 and NUP159 and is found only on the cytoplasmic periphery of the Nuclear Pore Complex (Ho et al. 2000). The fact that NSP1 is assigned to two orthologous groups (a 'Nuclear pore complex protein' KOG (KOG4719) and a 'Nuclear porin' KOG (KOG2196)) and the fact that it participates in two subcomplexes of the Nuclear Pore Complex, suggest that this is a multifunctional protein.

Removing it from the module results in the following profile:

| KOG     | <i>G. lambia</i> | <i>L. major</i> | <i>P. falciparum</i> | <i>T. parvum</i> | <i>C. parvum</i> | <i>O. tauri</i> | <i>C. merolae</i> | <i>A. thaliana</i> | <i>O. sativa</i> | <i>E. cuniculi</i> | <i>R. oryzae</i> | <i>C. neoformans</i> | <i>U. maydis</i> | <i>S. pombe</i> | <i>Y. lipolytica</i> | <i>C. guilliermondii</i> | <i>D. hansenii</i> | <i>C. glabrata</i> | <i>S. cerevisiae</i> | <i>K.lactis</i> | <i>E. gossypii</i> | <i>F. graminearum</i> | <i>N. crassa</i> | <i>S. sclerotiorum</i> | <i>C. immitis</i> | <i>A. nidulans</i> | <i>A. terreus</i> | <i>A. fumigatus</i> | <i>C. elegans</i> | <i>D. melanogaster</i> | <i>H. sapiens</i> | <i>M. musculus</i> | <i>D. discoideum</i> | <i>E. histolytica</i> |   |   |   |
|---------|------------------|-----------------|----------------------|------------------|------------------|-----------------|-------------------|--------------------|------------------|--------------------|------------------|----------------------|------------------|-----------------|----------------------|--------------------------|--------------------|--------------------|----------------------|-----------------|--------------------|-----------------------|------------------|------------------------|-------------------|--------------------|-------------------|---------------------|-------------------|------------------------|-------------------|--------------------|----------------------|-----------------------|---|---|---|
| KOG2168 |                  |                 |                      |                  |                  |                 | 1                 | 2                  | 1                |                    | 2                | 1                    | 1                | 1               | 1                    | 1                        | 1                  | 1                  | 1                    | 1               | 1                  | 1                     | 1                | 1                      | 1                 | 1                  | 1                 | 1                   | 1                 | 1                      | 1                 | 1                  | 1                    | 1                     | 1 | 1 |   |
| KOG2196 | 3                | 1               | 1                    | 1                | 1                |                 | 1                 | 1                  | 1                |                    | 1                | 1                    | 1                | 1               | 1                    | 1                        | 1                  | 1                  | 1                    | 1               | 1                  | 1                     | 1                | 1                      | 1                 | 1                  | 1                 | 1                   | 1                 | 1                      | 1                 | 1                  | 1                    | 1                     | 1 | 1 | 1 |
| KOG3091 | 1                |                 |                      |                  |                  |                 | 1                 |                    |                  |                    | 2                | 2                    | 1                | 1               | 2                    | 1                        | 1                  | 1                  | 1                    | 1               | 1                  | 1                     | 1                | 1                      | 1                 | 1                  | 1                 | 1                   | 1                 | 1                      | 1                 | 1                  | 1                    | 1                     | 1 | 1 | 1 |

which has a better raw score (23,3) than the original complex but because it has fewer components the cohesiveness score is lower: 0.78 instead of 0.797.

### Trusted KOGs

We compare our KOG-based orthologous groups with ones obtained with the orthoMCL program and trust only those KOGs who have at least 90% overlap with an orthoMCL orthologous group. Members of this module are all assigned to untrusted orthologous groups, therefore this filter removes the entire module.

### Inparalogs

We remove orthologous groups which are part of the 50% of orthologous groups with most inparalogs. All but one of the orthologous groups associated with this module belong to this top 50% and therefore the filter removes the entire module.

### Multifunctional proteins

We have filtered for multifunctional proteins in several ways: one of which was to remove proteins which are also part of another, non overlapping module in the same module definition. As we have seen in the comparison of PE scores, NSP1 is also part of an other complex containing NUP82 (Grandi et al. 1995). We also filtered for multifunctional proteins with the Gene Ontology. For each module we find overrepresented GO categories with the GO-TermFinder program (<http://search.cpan.org/dist/GO-TermFinder/>). To each module we assign those categories to which >80% of its subunits are assigned with a corrected P value < 0.001 (hypergeometric test for overrepresentation of GO categories among a group of proteins (subunits of a module)). Then for each subunit, we determine whether it shares the function with the rest of the module, and if so, whether it has an additional function ('parent' or 'child' functional categories are not considered to be different). Those proteins are removed. The fact that we consider only those modules which have the same GO category assigned to 80% of its components, already acts as a powerful filter and the extra benefit from removing multifunctional proteins is very small. In this example, the module has GO categories related to import and export to and from the nucleus associated to it, the proteins NSP1 and NUP49 are also assigned to GO categories related to the import/export/localization of the ribosome. If we remove these two proteins, we get the following profile:

| KOG     | <i>G. lambila</i> | <i>L. major</i> | <i>P. faiciparum</i> | <i>T. parvum</i> | <i>C. parvum</i> | <i>O. tauri</i> | <i>C. merolae</i> | <i>A. thaliana</i> | <i>O. sativa</i> | <i>E. cuciculi</i> | <i>R. oryzae</i> | <i>C. neoformans</i> | <i>U. maydis</i> | <i>S. pombe</i> | <i>Y. lipolytica</i> | <i>C. guilliermondii</i> | <i>D. hansenii</i> | <i>C. glabrata</i> | <i>S. cerevisiae</i> | <i>K.lactis</i> | <i>E. gossypii</i> | <i>F. graminearum</i> | <i>N. crassa</i> | <i>S. sclerotiorum</i> | <i>C. immitis</i> | <i>A. nidulans</i> | <i>A. terreus</i> | <i>A. fumigatus</i> | <i>C. elegans</i> | <i>D. melanogaster</i> | <i>H. sapiens</i> | <i>M. musculus</i> | <i>D. discoideum</i> | <i>E. histolytica</i> |   |   |  |
|---------|-------------------|-----------------|----------------------|------------------|------------------|-----------------|-------------------|--------------------|------------------|--------------------|------------------|----------------------|------------------|-----------------|----------------------|--------------------------|--------------------|--------------------|----------------------|-----------------|--------------------|-----------------------|------------------|------------------------|-------------------|--------------------|-------------------|---------------------|-------------------|------------------------|-------------------|--------------------|----------------------|-----------------------|---|---|--|
| KOG2168 |                   |                 |                      |                  |                  |                 | 1                 | 2                  | 1                |                    | 2                | 1                    | 1                | 2               | 1                    | 1                        | 1                  | 2                  | 1                    | 1               | 1                  | 1                     | 1                | 1                      | 1                 | 1                  | 1                 | 1                   | 1                 | 1                      | 2                 | 1                  | 1                    | 1                     | 1 |   |  |
| KOG3091 | 1                 |                 |                      |                  |                  |                 | 1                 |                    |                  |                    | 2                | 2                    | 1                | 1               | 2                    | 1                        | 1                  | 1                  | 1                    | 1               | 1                  | 1                     | 1                | 1                      | 1                 | 1                  | 1                 | 1                   | 1                 | 1                      | 1                 | 1                  | 1                    | 1                     | 1 | 1 |  |

This profile gets a raw score (14,7) and a cohesiveness score of 0.995, so after removal of multifunctional proteins, this module is evolving cohesively.



## E3: A cohesively evolving complex: TFIIF complex (MIPS)

### Description:

TFIIF is a transcription factor complex in the MIPS dataset, which, in the presence of ATP, phosphorylates RNA polymerase II which allows it to initiate transcription. Phosphorylation is performed by the kinase KIN28.

### Subunits:

| ORF     | gene name | annotation                                                          | KOG     |
|---------|-----------|---------------------------------------------------------------------|---------|
| YPR056W | TFB4      | Component of RNA polymerase transcription initiation TFIIF factor   | KOG2487 |
| YLR005W | SSL1      | TFIIF subunit (transcription initiation factor), factor B           | KOG2807 |
| YDR311W | TFB1      | TFIIF subunit (transcription initiation factor), 75 kD              | KOG2074 |
| YDL108W | KIN28     | Cyclin-dependent ser/thr protein kinase                             | KOG0659 |
| YDR460W | TFB3      | TFIIF subunit (transcription/repair factor)                         | KOG3800 |
| YPR025C | CCL1      | TFIIF subunit (transcription initiation factor), cyclin C component | KOG2496 |
| YER171W | RAD3      | DNA helicase/ATPase                                                 | KOG1131 |
| YPL122C | TFB2      | TFIIF subunit (transcription/repair factor)                         | KOG3471 |
| YIL143C | SSL2      | DNA helicase                                                        | KOG1123 |

(annotation from the *Saccharomyces* Genome Database)

### Profile:

| KOG     | <i>G. lambila</i> | <i>L. major</i> | <i>P. falciparum</i> | <i>T. parvum</i> | <i>C. parvum</i> | <i>O. tauri</i> | <i>C. merolae</i> | <i>A. thaliana</i> | <i>O. sativa</i> | <i>E. cuciculi</i> | <i>R. oryzae</i> | <i>C. neoformans</i> | <i>U. maydis</i> | <i>S. pombe</i> | <i>Y. lipolytica</i> | <i>C. guilliermondii</i> | <i>D. hansenii</i> | <i>C. glabrata</i> | <i>S. cerevisiae</i> | <i>K. lactis</i> | <i>E. gossypii</i> | <i>F. graminearum</i> | <i>N. crassa</i> | <i>S. sclerotiorum</i> | <i>C. immitis</i> | <i>A. nidulans</i> | <i>A. terreus</i> | <i>A. fumigatus</i> | <i>C. elegans</i> | <i>D. melanogaster</i> | <i>H. sapiens</i> | <i>M. musculus</i> | <i>D. discoideum</i> | <i>E. histolytica</i> |   |
|---------|-------------------|-----------------|----------------------|------------------|------------------|-----------------|-------------------|--------------------|------------------|--------------------|------------------|----------------------|------------------|-----------------|----------------------|--------------------------|--------------------|--------------------|----------------------|------------------|--------------------|-----------------------|------------------|------------------------|-------------------|--------------------|-------------------|---------------------|-------------------|------------------------|-------------------|--------------------|----------------------|-----------------------|---|
| KOG2487 | 1                 | 1               | 1                    | 1                | 1                | 1               | 1                 | 1                  | 1                | 1                  | 1                | 1                    | 1                | 1               | 1                    | 1                        | 1                  | 1                  | 1                    | 1                | 1                  | 1                     | 1                | 1                      | 1                 | 1                  | 1                 | 1                   | 1                 | 1                      | 1                 | 1                  | 1                    | 1                     |   |
| KOG2807 | 1                 | 1               | 1                    | 1                | 1                | 1               | 1                 | 1                  | 1                | 1                  | 1                | 1                    | 1                | 1               | 1                    | 1                        | 1                  | 1                  | 1                    | 1                | 1                  | 1                     | 1                | 1                      | 1                 | 1                  | 1                 | 1                   | 1                 | 1                      | 1                 | 1                  | 1                    | 1                     | 1 |
| KOG2074 | 1                 | 1               | 1                    | 1                | 1                | 1               | 1                 | 1                  | 1                | 1                  | 1                | 1                    | 1                | 1               | 1                    | 1                        | 1                  | 1                  | 1                    | 1                | 1                  | 1                     | 1                | 1                      | 1                 | 1                  | 1                 | 1                   | 1                 | 1                      | 1                 | 1                  | 1                    | 1                     | 1 |
| KOG0659 | 1                 | 1               | 1                    | 1                | 1                | 1               | 1                 | 1                  | 1                | 1                  | 1                | 1                    | 1                | 1               | 1                    | 1                        | 1                  | 1                  | 1                    | 1                | 1                  | 1                     | 1                | 1                      | 1                 | 1                  | 1                 | 1                   | 1                 | 1                      | 1                 | 1                  | 1                    | 1                     | 1 |
| KOG3800 | 1                 | 1               | 1                    | 1                | 1                | 1               | 1                 | 1                  | 1                | 1                  | 1                | 1                    | 1                | 1               | 1                    | 1                        | 1                  | 1                  | 1                    | 1                | 1                  | 1                     | 1                | 1                      | 1                 | 1                  | 1                 | 1                   | 1                 | 1                      | 1                 | 1                  | 1                    | 1                     | 1 |
| KOG2496 | 1                 | 1               | 1                    | 1                | 1                | 1               | 1                 | 1                  | 1                | 1                  | 1                | 1                    | 1                | 1               | 1                    | 1                        | 1                  | 1                  | 1                    | 1                | 1                  | 1                     | 1                | 1                      | 1                 | 1                  | 1                 | 1                   | 1                 | 1                      | 1                 | 1                  | 1                    | 1                     | 1 |
| KOG1131 | 1                 | 1               | 1                    | 1                | 1                | 1               | 1                 | 1                  | 1                | 1                  | 1                | 1                    | 1                | 1               | 1                    | 1                        | 1                  | 1                  | 1                    | 1                | 1                  | 1                     | 1                | 1                      | 1                 | 1                  | 1                 | 1                   | 1                 | 1                      | 1                 | 1                  | 1                    | 1                     | 1 |
| KOG3471 | 1                 | 1               | 1                    | 1                | 1                | 1               | 1                 | 1                  | 1                | 1                  | 1                | 1                    | 1                | 1               | 1                    | 1                        | 1                  | 1                  | 1                    | 1                | 1                  | 1                     | 1                | 1                      | 1                 | 1                  | 1                 | 1                   | 1                 | 1                      | 1                 | 1                  | 1                    | 1                     | 1 |
| KOG1123 | 1                 | 1               | 1                    | 1                | 1                | 1               | 1                 | 1                  | 1                | 1                  | 1                | 1                    | 1                | 1               | 1                    | 1                        | 1                  | 1                  | 1                    | 1                | 1                  | 1                     | 1                | 1                      | 1                 | 1                  | 1                 | 1                   | 1                 | 1                      | 1                 | 1                  | 1                    | 1                     | 1 |

### Cohesiveness Scores:

| Scores                          | raw     | compared to background |
|---------------------------------|---------|------------------------|
| Avg Co-occurrence               | 0.86    | 0.99                   |
| Avg Deviation From Modular      | 0.09    | 0.99                   |
| Homogeneous Columns             | 23      | 0.99                   |
| Species Absent                  | 0       | 0                      |
| Species Present                 | 23      | 0.99                   |
| Species Present, Species Absent | (23, 0) | 0.99                   |

Cohesiveness scores for different measures. Species Present, Species Absent is the score used throughout the article. Raw scores are compared to 100000 random modules of the same size, cohesiveness scores for each raw score are obtained by counting the number of random modules with a better raw score (or in case of a multidimensional method: better raw scores) and dividing that number by 100000.

### Filters:

#### Cross-comparison of module datasets

With this filter, we keep the combination of the largest number of components which have been found together in a complex or pathway in one of the other datasets. This module has been completely confirmed by the 'transcription factor TFIIF'-complex in the Aloy dataset, which has two additional components: CDC27 and FPR1.

#### Additional subunits in 'transcription factor TFIIF'-complex in the Aloy dataset

|         |       |                                                                                                                                                                                                              |         |
|---------|-------|--------------------------------------------------------------------------------------------------------------------------------------------------------------------------------------------------------------|---------|
| YBL084C | CDC27 | Subunit of the Anaphase-Promoting Complex/Cyclosome (APC/C), a ubiquitin-protein ligase required for degradation of anaphase inhibitors, including mitotic cyclins, during the metaphase/anaphase transition | KOG1126 |
| YNL135C | FPR1  | Peptidyl-prolyl cis-trans isomerase (PPIase), binds to the drugs FK506 and rapamycin; also binds to the nonhistone chromatin binding protein Hmo1p and may regulate its assembly or function                 | KOG0544 |

(annotation from the *Saccharomyces* Genome Database)



## Inparalogs

The 50% of orthologous groups with most inparalogs are removed from all modules. This boils down to orthologous groups having more than 7 inparalogs being removed. In our example, this means that KOG2496, KOG0659 and KOG1123 are removed which results in the following profile:

| KOG     | <i>G. lamblia</i> | <i>L. major</i> | <i>P. falciparum</i> | <i>T. parvum</i> | <i>C. parvum</i> | <i>O. tauri</i> | <i>C. merolae</i> | <i>A. thaliana</i> | <i>O. sativa</i> | <i>E. cuciculi</i> | <i>R. oryzae</i> | <i>C. neoformans</i> | <i>U. maydis</i> | <i>S. pombe</i> | <i>Y. lipolytica</i> | <i>C. guilliermondii</i> | <i>D. hansenii</i> | <i>C. glabrata</i> | <i>S. cerevisiae</i> | <i>K.lactis</i> | <i>E. gossypii</i> | <i>F. graminearum</i> | <i>N. crassa</i> | <i>S. sclerotiorum</i> | <i>C. immitis</i> | <i>A. nidulans</i> | <i>A. terreus</i> | <i>A. fumigatus</i> | <i>C. elegans</i> | <i>D. melanogaster</i> | <i>H. sapiens</i> | <i>M. musculus</i> | <i>D. discoidum</i> | <i>E. histolytica</i> |   |   |   |
|---------|-------------------|-----------------|----------------------|------------------|------------------|-----------------|-------------------|--------------------|------------------|--------------------|------------------|----------------------|------------------|-----------------|----------------------|--------------------------|--------------------|--------------------|----------------------|-----------------|--------------------|-----------------------|------------------|------------------------|-------------------|--------------------|-------------------|---------------------|-------------------|------------------------|-------------------|--------------------|---------------------|-----------------------|---|---|---|
| KOG2487 | 1                 | 1               | 1                    | 1                | 1                | 1               | 1                 | 1                  | 1                | 1                  | 1                | 1                    | 1                | 1               | 1                    | 1                        | 1                  | 1                  | 1                    | 1               | 1                  | 1                     | 1                | 1                      | 1                 | 1                  | 1                 | 1                   | 1                 | 1                      | 1                 | 1                  | 1                   | 1                     | 1 | 1 |   |
| KOG2807 | 1                 | 1               | 1                    | 1                | 1                | 1               | 1                 | 1                  | 1                | 1                  | 1                | 1                    | 1                | 1               | 1                    | 1                        | 1                  | 1                  | 1                    | 1               | 1                  | 1                     | 1                | 1                      | 1                 | 1                  | 1                 | 1                   | 1                 | 1                      | 1                 | 1                  | 1                   | 1                     | 1 | 1 | 1 |
| KOG2074 | 1                 | 1               | 1                    | 1                | 1                | 1               | 1                 | 1                  | 1                | 1                  | 1                | 1                    | 1                | 1               | 1                    | 1                        | 1                  | 1                  | 1                    | 1               | 1                  | 1                     | 1                | 1                      | 1                 | 1                  | 1                 | 1                   | 1                 | 1                      | 1                 | 1                  | 1                   | 1                     | 1 | 1 | 1 |
| KOG3800 | 1                 | 1               | 1                    | 1                | 1                | 1               | 1                 | 1                  | 1                | 1                  | 1                | 1                    | 1                | 1               | 1                    | 1                        | 1                  | 1                  | 1                    | 1               | 1                  | 1                     | 1                | 1                      | 1                 | 1                  | 1                 | 1                   | 1                 | 1                      | 1                 | 1                  | 1                   | 1                     | 1 | 1 | 1 |
| KOG1131 | 1                 | 1               | 1                    | 1                | 1                | 1               | 1                 | 1                  | 1                | 1                  | 1                | 1                    | 1                | 1               | 1                    | 1                        | 1                  | 1                  | 1                    | 1               | 1                  | 1                     | 1                | 1                      | 1                 | 1                  | 1                 | 1                   | 1                 | 1                      | 1                 | 1                  | 1                   | 1                     | 1 | 1 | 1 |
| KOG3471 | 1                 | 1               | 1                    | 1                | 1                | 1               | 1                 | 1                  | 1                | 1                  | 1                | 1                    | 1                | 1               | 1                    | 1                        | 1                  | 1                  | 1                    | 1               | 1                  | 1                     | 1                | 1                      | 1                 | 1                  | 1                 | 1                   | 1                 | 1                      | 1                 | 1                  | 1                   | 1                     | 1 | 1 | 1 |

The raw score is unchanged, but the cohesiveness score is now 0.958. Similar results are obtained if one removes orthologous groups based on the fraction of inparalogs instead of the number.

## Multifunctional proteins

We have filtered for multifunctional proteins in several ways: one of which was to remove proteins which are also part of an other, nonoverlapping module in the same module definition. The TIIFH complex from MIPS in our example does not contain any multifunctional proteins.

## E4: A cohesively evolving pathway: Valine biosynthesis (SGD)

### Description:

The valine biosynthesis pathway consists of four steps: in the first step pyruvate resulting from glycolysis is turned into 2-aceto-lactate by ILV2 and ILV6, which in the second step converted to 2,3-dehydroxy-valerate by ILV5, which is then turned into 2-keto-isovalerate by the dehydratase ILV2 and in the final step this 2-keto-isovalerate converted to L-Valine by BAT1 and BAT2.

### Subunits:

| ORF     | gene name | annotation                                                                                                                                                                                                                                 | KOG     |
|---------|-----------|--------------------------------------------------------------------------------------------------------------------------------------------------------------------------------------------------------------------------------------------|---------|
| YCL009C | ILV6      | Regulatory subunit of acetolactate synthase, which catalyzes the first step of branched-chain amino acid biosynthesis; enhances activity of the Ilv2p catalytic subunit, localizes to mitochondria                                         | KOG2663 |
| YLR355C | ILV5      | Acetohydroxyacid reductoisomerase, mitochondrial protein involved in branched-chain amino acid biosynthesis, also required for maintenance of wild-type mitochondrial DNA and found in mitochondrial nucleoids                             | KOG9832 |
| YJR016C | ILV3      | Dihydroxyacid dehydratase, catalyzes third step in the common pathway leading to biosynthesis of branched-chain amino acids                                                                                                                | KOG2448 |
| YMR108W | ILV2      | Acetolactate synthase, catalyses the first common step in isoleucine and valine biosynthesis and is the target of several classes of inhibitors, localizes to the mitochondria; expression of the gene is under general amino acid control | KOG4166 |
| YHR208W | BAT1      | Mitochondrial branched-chain amino acid aminotransferase                                                                                                                                                                                   | KOG0975 |
| YJR148W | BAT2      | Cytosolic branched-chain amino acid aminotransferase                                                                                                                                                                                       |         |

(pathway and annotation from the *Saccharomyces* Genome Database)

Subunits BAT1 and BAT2 are the result of the whole genome duplication which occurred in the ancestor of *S. cerevisiae* (Byrne and Wolfe 2005). These subunits are also involved in valine degradation in animals and *L. Major*.

### Profile:

|         | <i>G. lambita</i> | <i>L. major</i> | <i>P. falciparum</i> | <i>T. parvum</i> | <i>C. parvum</i> | <i>O. tauri</i> | <i>C. merolae</i> | <i>A. thaliana</i> | <i>O. sativa</i> | <i>E. cuniculi</i> | <i>R. oryzae</i> | <i>C. neoformans</i> | <i>U. maydis</i> | <i>S. pombe</i> | <i>Y. lipolytica</i> | <i>C. guilliermondii</i> | <i>D. hansenii</i> | <i>C. glabrata</i> | <i>S. cerevisiae</i> | <i>K. lactis</i> | <i>E. gossypii</i> | <i>F. graminearum</i> | <i>N. crassa</i> | <i>S. sclerotiorum</i> | <i>C. immitis</i> | <i>A. nidulans</i> | <i>A. terreus</i> | <i>A. fumigatus</i> | <i>C. elegans</i> | <i>D. melanogaster</i> | <i>H. sapiens</i> | <i>M. musculus</i> | <i>D. discoidium</i> | <i>E. histolytica</i> |  |
|---------|-------------------|-----------------|----------------------|------------------|------------------|-----------------|-------------------|--------------------|------------------|--------------------|------------------|----------------------|------------------|-----------------|----------------------|--------------------------|--------------------|--------------------|----------------------|------------------|--------------------|-----------------------|------------------|------------------------|-------------------|--------------------|-------------------|---------------------|-------------------|------------------------|-------------------|--------------------|----------------------|-----------------------|--|
| KOG2663 |                   |                 |                      |                  |                  | 1               | 1                 | 2                  | 2                |                    | 2                | 1                    | 1                | 1               | 1                    | 1                        | 1                  | 1                  | 1                    | 1                | 1                  | 1                     | 1                | 1                      | 1                 | 1                  | 1                 | 1                   |                   |                        |                   |                    |                      |                       |  |
| KOG9832 |                   |                 |                      |                  |                  | 1               | 1                 | 1                  | 2                |                    | 2                | 1                    | 1                | 1               | 1                    | 1                        | 1                  | 1                  | 1                    | 1                | 1                  | 1                     | 1                | 1                      | 1                 | 1                  | 1                 | 1                   |                   |                        |                   |                    |                      |                       |  |
| KOG2448 |                   |                 |                      |                  |                  | 1               | 1                 | 1                  | 1                |                    | 2                | 2                    | 2                | 1               | 1                    | 1                        | 1                  | 1                  | 1                    | 1                | 1                  | 3                     | 2                | 2                      | 2                 | 4                  | 5                 | 4                   |                   |                        |                   |                    |                      |                       |  |
| KOG4166 |                   |                 |                      |                  |                  | 1               | 2                 | 1                  | 3                |                    | 1                | 1                    | 1                | 1               | 1                    | 1                        | 1                  | 1                  | 1                    | 1                | 1                  | 1                     | 1                | 1                      | 1                 | 1                  | 4                 | 1                   |                   |                        |                   |                    |                      |                       |  |
| KOG0975 | 1                 | 1               |                      |                  |                  | 2               | 2                 | 9                  | 5                |                    | 4                | 2                    | 3                | 1               | 2                    | 1                        | 1                  | 2                  | 2                    | 1                | 1                  | 6                     | 3                | 3                      | 2                 | 6                  | 5                 | 4                   | 2                 | 1                      | 2                 | 2                  | 1                    |                       |  |

### Cohesiveness Scores:

| Scores                          | raw     | compared to background |
|---------------------------------|---------|------------------------|
| Avg Co-occurrence               | 0.92    | 0.995                  |
| Avg Deviation From Modular      | 0.04    | 0.996                  |
| Homogeneous Columns             | 23      | 0.99                   |
| Species Absent                  | 5       | 0.97                   |
| Species Present                 | 22      | 0.89                   |
| Species Present, Species Absent | (22, 5) | 0.99998                |

Cohesiveness scores for different measures. Species Present, Species Absent is the score used throughout the article. Raw scores are compared to 100000 random modules of the same size, cohesiveness scores for each raw scores are obtained by counting the number of random modules with a better raw score (or in case of a multidimensional method: better raw scores) and dividing that number by 100000.

### Filters:

#### Cross-comparison of module datasets

We keep the combination of the largest number of components which have been found together in a complex or pathway in an other dataset. This module has been confirmed by the 'Pantothenate and CoA biosynthesis', 'Valine, leucine and isoleucine biosynthesis', 'superpathway of isoleucine and valine biosynthesis' and the 'superpathway of leucine, valine, and isoleucine biosynthesis' pathways in the KEGG dataset. Therefore this module passes the cross-comparison filter without losing a subunit.

### Filtering with Purification Enrichment scores:

In this filter, we first remove all components with a zero PE score with all other components (in this example ILV3 and ILV2). Subsequently, we cluster the components with single linkage with  $-1 * PE$  score as distance, we obtain two clusters and remove the smallest cluster. In this case in the last step ILV6 is removed from the module and we are left with a module consisting of one KOG, therefore we can not calculate a score. There are no proteins which are more likely to interact with a protein outside the module than with a fellow module member.

|      | ILV6 | ILV5 | ILV3 | ILV2 | BAT1 | BAT2 |
|------|------|------|------|------|------|------|
| ILV6 |      | 0.5  | 0    | 0    | 0    | 0    |
| ILV5 | 0.5  |      | 0    | 0    | 0    | 0    |
| ILV3 | 0    | 0    |      | 0    | 0    | 0    |
| ILV2 | 0    | 0    | 0    |      | 0    | 0    |
| BAT1 | 0    | 0    | 0    | 0    |      | 5    |
| BAT2 | 0    | 0    | 0    | 0    | 5    |      |

### Trusted KOGs

We compare our KOG-based orthologous groups with ones obtained with the orthoMCL program and trust only those KOGs who have at least 90% overlap with an orthoMCL orthologous group. Based on this criterion, KOG2448, KOG4166 and KOG0975 are regarded as unreliable and removed. This results in a submodule with a better raw score (22, 12) but a lower cohesiveness score (0.99986). This perfectly cohesive pattern is not considered cohesive, because, due to the underlying phylogeny, multiple orthologous groups show this pattern of presence and absence and have the same raw score.

|         | <i>G. lamblia</i> | <i>L. major</i> | <i>P. falciparum</i> | <i>T. parvum</i> | <i>C. parvum</i> | <i>O. tauri</i> | <i>C. merolae</i> | <i>A. thaliana</i> | <i>O. sativa</i> | <i>E. cuniculi</i> | <i>R. oryzae</i> | <i>C. neoformans</i> | <i>U. maydis</i> | <i>S. pombe</i> | <i>Y. lipolytica</i> | <i>C. guilliermondii</i> | <i>D. hansenii</i> | <i>C. glabrata</i> | <i>S. cerevisiae</i> | <i>K. lactis</i> | <i>E. gossypii</i> | <i>F. graminearum</i> | <i>N. crassa</i> | <i>S. sclerotiorum</i> | <i>C. immitis</i> | <i>A. nidulans</i> | <i>A. terreus</i> | <i>A. fumigatus</i> | <i>C. elegans</i> | <i>D. melanogaster</i> | <i>H. sapiens</i> | <i>M. musculus</i> | <i>D. discoideum</i> | <i>E. histolytica</i> |   |
|---------|-------------------|-----------------|----------------------|------------------|------------------|-----------------|-------------------|--------------------|------------------|--------------------|------------------|----------------------|------------------|-----------------|----------------------|--------------------------|--------------------|--------------------|----------------------|------------------|--------------------|-----------------------|------------------|------------------------|-------------------|--------------------|-------------------|---------------------|-------------------|------------------------|-------------------|--------------------|----------------------|-----------------------|---|
| KOG2663 |                   |                 |                      |                  |                  | 1               | 1                 | 2                  | 2                |                    | 2                | 1                    | 1                | 1               | 1                    | 1                        | 1                  | 1                  | 1                    | 1                | 1                  | 1                     | 1                | 1                      | 1                 | 1                  | 1                 | 1                   | 1                 | 1                      | 1                 | 1                  | 1                    | 1                     |   |
| KOG9832 |                   |                 |                      |                  |                  | 1               | 1                 | 1                  | 2                |                    | 2                | 1                    | 1                | 1               | 1                    | 1                        | 1                  | 1                  | 1                    | 1                | 1                  | 1                     | 1                | 1                      | 1                 | 1                  | 1                 | 1                   | 1                 | 1                      | 1                 | 1                  | 1                    | 1                     | 1 |

### Inparalogs

When we remove orthologous groups which are part of the 50% of orthologous groups with most inparalogs, we remove the only untrusted orthologous groups. The result is the same as described in the paragraph above.

## E5: A flexibly evolving pathway: Valine degradation (SGD)

### Description:

Branched chain and aromatic amino acids are degraded by *S. cerevisiae* via the Ehrlich pathway, which consists of the following three steps: deamination of the amino acid, decarboxylation of the resulting alpha-keto acid and the reduction of the resulting aldehyde to alcohol.

### Subunits:

| ORF     | gene name | annotation                                                                                                                                                                                                                                     | KOG     |
|---------|-----------|------------------------------------------------------------------------------------------------------------------------------------------------------------------------------------------------------------------------------------------------|---------|
| YDL168W | SFA1      | Bifunctional enzyme containing both alcohol dehydrogenase and glutathione-dependent formaldehyde dehydrogenase activities, functions in formaldehyde detoxification and formation of long chain and complex alcohols, regulated by Hog1p-Sko1p | KOG0022 |
| YGL256W | ADH4      | Alcohol dehydrogenase isoenzyme type IV, dimeric enzyme demonstrated to be zinc-dependent despite sequence similarity to iron-activated alcohol dehydrogenases; transcription is induced in response to zinc deficiency                        | KOG3857 |
| YHR208W | BAT1      | Mitochondrial branched-chain amino acid aminotransferase                                                                                                                                                                                       | KOG0975 |
| YJR148W | BAT2      | Cytosolic branched-chain amino acid aminotransferase                                                                                                                                                                                           |         |
| YLR134W | PDC5      | Minor isoform of pyruvate decarboxylase, key enzyme in alcoholic fermentation, decarboxylates pyruvate to acetaldehyde, regulation is glucose- and ethanol-dependent, repressed by thiamine, involved in amino acid catabolism                 | KOG1184 |
| YGR087C | PDC6      | Minor isoform of pyruvate decarboxylase, decarboxylates pyruvate to acetaldehyde, involved in amino acid catabolism; transcription is glucose- and ethanol-dependent, and is strongly induced during sulfur limitation                         |         |
| YLR044C | PDC1      | Major of three pyruvate decarboxylase isozymes, key enzyme in alcoholic fermentation, decarboxylates pyruvate to acetaldehyde; subject to glucose-, ethanol-, and autoregulation; involved in amino acid catabolism                            |         |
| YBR145W | ADH5      | Alcohol dehydrogenase isoenzyme V; involved in ethanol production                                                                                                                                                                              | KOG0023 |
| YMR083W | ADH3      | Mitochondrial alcohol dehydrogenase isozyme III; involved in the shuttling of mitochondrial NADH to the cytosol under anaerobic conditions and ethanol production                                                                              |         |
| YMR303C | ADH2      | Glucose-repressible alcohol dehydrogenase II, catalyzes the conversion of ethanol to acetaldehyde; involved in the production of certain carboxylate esters; regulated by ADR1                                                                 |         |
| YOL086C | ADH1      | Alcohol dehydrogenase, fermentative isozyme active as homo- or heterotetramers; required for the reduction of acetaldehyde to ethanol, the last step in the glycolytic pathway                                                                 |         |

(pathway and annotation from the *Saccharomyces* Genome Database)

Subunits BAT1 and BAT2 are ohnologs. The same goes for PDC1, PDC5 and PDC6. Unlike ADH1, ADH2, ADH3 and ADH5, ADH4 contains the PFAM domain 'Fe-ADH' associated with the orthologous group KOG3857'. Some fungal members of this orthologous group have a duplicate which, apart from the 'Fe-ADH' domain, contains an additional 'DHQ\_synthase'. (Finn et al. 2008)

### Profile:

| KOG     | <i>G. lambia</i> | <i>L. major</i> | <i>P. falciparum</i> | <i>T. parvum</i> | <i>C. parvum</i> | <i>O. tauri</i> | <i>C. merolae</i> | <i>A. thaliana</i> | <i>O. sativa</i> | <i>E. cucullii</i> | <i>R. oryzae</i> | <i>C. neoformans</i> | <i>U. maydis</i> | <i>S. pombe</i> | <i>Y. lipolytica</i> | <i>C. guilliermondii</i> | <i>D. hansenii</i> | <i>C. glabrata</i> | <i>S. cerevisiae</i> | <i>K. lactis</i> | <i>E. gossypii</i> | <i>F. graminearum</i> | <i>N. crassa</i> | <i>S. sclerotiorum</i> | <i>C. immitis</i> | <i>A. nidulans</i> | <i>A. terreus</i> | <i>A. fumigatus</i> | <i>C. elegans</i> | <i>D. melanogaster</i> | <i>H. sapiens</i> | <i>M. musculus</i> | <i>D. discoideum</i> | <i>E. histolytica</i> |   |   |   |   |
|---------|------------------|-----------------|----------------------|------------------|------------------|-----------------|-------------------|--------------------|------------------|--------------------|------------------|----------------------|------------------|-----------------|----------------------|--------------------------|--------------------|--------------------|----------------------|------------------|--------------------|-----------------------|------------------|------------------------|-------------------|--------------------|-------------------|---------------------|-------------------|------------------------|-------------------|--------------------|----------------------|-----------------------|---|---|---|---|
| KOG0022 | 1                | 1               | 1                    | 1                | 1                | 1               | 1                 | 1                  | 1                | 1                  | 1                | 1                    | 1                | 1               | 1                    | 1                        | 1                  | 1                  | 1                    | 1                | 1                  | 1                     | 1                | 1                      | 1                 | 1                  | 1                 | 1                   | 1                 | 1                      | 1                 | 1                  | 1                    | 1                     | 1 | 1 |   |   |
| KOG3857 | 4                | 1               | 1                    | 1                | 1                | 1               | 1                 | 1                  | 1                | 1                  | 1                | 1                    | 1                | 1               | 1                    | 1                        | 1                  | 1                  | 1                    | 1                | 1                  | 1                     | 1                | 1                      | 1                 | 1                  | 1                 | 1                   | 1                 | 1                      | 1                 | 1                  | 1                    | 1                     | 1 | 1 | 1 |   |
| KOG1184 | 1                | 1               | 1                    | 1                | 1                | 1               | 1                 | 1                  | 1                | 1                  | 1                | 1                    | 1                | 1               | 1                    | 1                        | 1                  | 1                  | 1                    | 1                | 1                  | 1                     | 1                | 1                      | 1                 | 1                  | 1                 | 1                   | 1                 | 1                      | 1                 | 1                  | 1                    | 1                     | 1 | 1 | 1 |   |
| KOG0023 | 1                | 1               | 1                    | 1                | 1                | 1               | 1                 | 1                  | 1                | 1                  | 1                | 1                    | 1                | 1               | 1                    | 1                        | 1                  | 1                  | 1                    | 1                | 1                  | 1                     | 1                | 1                      | 1                 | 1                  | 1                 | 1                   | 1                 | 1                      | 1                 | 1                  | 1                    | 1                     | 1 | 1 | 1 |   |
| KOG0975 | 1                | 1               | 1                    | 1                | 1                | 1               | 1                 | 1                  | 1                | 1                  | 1                | 1                    | 1                | 1               | 1                    | 1                        | 1                  | 1                  | 1                    | 1                | 1                  | 1                     | 1                | 1                      | 1                 | 1                  | 1                 | 1                   | 1                 | 1                      | 1                 | 1                  | 1                    | 1                     | 1 | 1 | 1 | 1 |

### Cohesiveness Scores:

|                                 | Scores | raw     | compared to background |
|---------------------------------|--------|---------|------------------------|
| Avg Co-occurrence               |        | 0.75    | 0.71                   |
| Avg Deviation From Modular      |        | 0.14    | 0.75                   |
| Homogeneous Columns             |        | 16      | 0.67                   |
| Species Absent                  |        | 3       | 0.9                    |
| Species Present                 |        | 13      | 0.6                    |
| Species Present, Species Absent |        | (13, 3) | 0.98                   |

Cohesiveness scores for different measures. Species Present, Species Absent is the score used throughout the article. Raw scores are compared to 100000 random modules of the same size, cohesiveness scores for each raw scores are obtained by counting the number of random modules with a better raw score (or in case of a multidimensional method: better raw scores) and dividing that number by 100000.

## Filters:

### Cross-comparison of module datasets

We keep the combination of the largest number of components which have been found together in a complex or pathway in an other dataset. Only part of this module (proteins ADH5, SFA1, ADH4, PDC6, PDC1, PDC5, ADH3, ADH2 and ADH1) overlaps with the KEGG Glycolysis/Gluconeogenesis pathway. The proteins removed are all duplicates, so the set of KOGs and the scores remain the same.

| KOG     | <i>G. lambia</i> | <i>L. major</i> | <i>P. falciparum</i> | <i>T. parvum</i> | <i>C. parvum</i> | <i>O. tauri</i> | <i>C. merolae</i> | <i>A. thaliana</i> | <i>O. sativa</i> | <i>E. cucullii</i> | <i>R. oryzae</i> | <i>C. neoformans</i> | <i>U. maydis</i> | <i>S. pombe</i> | <i>Y. lipolytica</i> | <i>C. guilliermondii</i> | <i>D. hansenii</i> | <i>C. glabrata</i> | <i>S. cerevisiae</i> | <i>K. lacis</i> | <i>E. gossypii</i> | <i>F. graminearum</i> | <i>N. crassa</i> | <i>S. sclerotiorum</i> | <i>C. immitis</i> | <i>A. nidulans</i> | <i>A. terreus</i> | <i>A. fumigatus</i> | <i>C. elegans</i> | <i>D. melanogaster</i> | <i>H. sapiens</i> | <i>M. musculus</i> | <i>D. discoideum</i> | <i>E. histolytica</i> |
|---------|------------------|-----------------|----------------------|------------------|------------------|-----------------|-------------------|--------------------|------------------|--------------------|------------------|----------------------|------------------|-----------------|----------------------|--------------------------|--------------------|--------------------|----------------------|-----------------|--------------------|-----------------------|------------------|------------------------|-------------------|--------------------|-------------------|---------------------|-------------------|------------------------|-------------------|--------------------|----------------------|-----------------------|
| KOG0022 | 1                | 1               | 1                    | 1                | 1                | 1               | 1                 | 10                 | 12               | 1                  | 1                | 1                    | 1                | 1               | 1                    | 1                        | 1                  | 1                  | 1                    | 1               | 1                  | 2                     | 2                | 2                      | 2                 | 5                  | 5                 | 2                   | 2                 | 1                      | 7                 | 6                  | 1                    | 1                     |
| KOG3857 | 4                | 1               | 1                    | 1                | 1                | 1               | 1                 | 1                  | 1                | 1                  | 1                | 1                    | 1                | 1               | 1                    | 1                        | 1                  | 1                  | 1                    | 1               | 1                  | 3                     | 1                | 2                      | 2                 | 3                  | 2                 | 3                   | 1                 | 1                      | 1                 | 1                  | 1                    | 1                     |
| KOG1184 | 1                | 1               | 1                    | 1                | 1                | 1               | 1                 | 1                  | 1                | 1                  | 1                | 1                    | 1                | 1               | 1                    | 1                        | 1                  | 1                  | 1                    | 1               | 1                  | 4                     | 3                | 3                      | 2                 | 2                  | 5                 | 3                   | 1                 | 1                      | 1                 | 1                  | 1                    | 1                     |
| KOG0023 | 1                | 1               | 1                    | 1                | 1                | 1               | 1                 | 9                  | 12               | 1                  | 12               | 7                    | 6                | 1               | 5                    | 4                        | 6                  | 4                  | 6                    | 5               | 3                  | 16                    | 6                | 10                     | 6                 | 13                 | 14                | 10                  | 3                 | 1                      | 1                 | 1                  | 1                    | 8                     |

### Filtering with Purification Enrichment scores:

|      | SFA1 | ADH4 | BAT1 | BAT2 | PDC5 | PDC6 | PDC1 | ADH5 | ADH3 | ADH2 | ADH1 |
|------|------|------|------|------|------|------|------|------|------|------|------|
| SFA1 |      | 0    | 0    | 0    | 0    | 0    | 0    | 0    | 0    | 0    | 0    |
| ADH4 | 0    |      | 0.7  | 0    | 0    | 0    | 0    | 0    | 0    | 0    | 0    |
| BAT1 | 0    | 0.7  |      | 5.0  | 0    | 0    | 0    | 0    | 0    | 0    | 0    |
| BAT2 | 0    | 0    | 5.0  |      | 0    | 0    | 0    | 0    | 0    | 0    | 0    |
| PDC5 | 0    | 0    | 0    | 0    |      | 0    | 2.0  | 0    | 0.6  | 0    | 0    |
| PDC6 | 0    | 0    | 0    | 0    | 0    |      | 1.3  | 2.7  | 0.9  | 1.7  | 0    |
| PDC1 | 0    | 0    | 0    | 0    | 2.0  | 1.3  |      | 1.5  | 2.2  | 4.0  | 0    |
| ADH5 | 0    | 0    | 0    | 0    | 0    | 2.7  | 1.5  |      | 2.5  | 3.6  | 0    |
| ADH3 | 0    | 0    | 0    | 0    | 0.6  | 0.9  | 2.2  | 2.5  |      | 5.3  | 0    |
| ADH2 | 0    | 0    | 0    | 0    | 0    | 1.7  | 4.0  | 3.6  | 5.3  |      | 0    |
| ADH1 | 0    | 0    | 0    | 0    | 0    | 0    | 0    | 0    | 0    | 0    |      |

In this filter, we first remove all components with a zero PE score with all other components and cluster the remaining components with single linkage with  $-1 * PE$  score as distance, we obtain two clusters and remove the smallest cluster. We apply this filter only to those modules of which all members have at least one interaction with an associated confidence score  $\geq 0.2$  and this pathway has some members which do not interact with any other protein. So we don't apply the filter here. The matrix with PE scores between module members id printed below.

### Trusted KOGs

We compare our KOG-based orthologous groups with ones obtained with the orthoMCL program and trust only those KOGs who have at least 90% overlap with an orthoMCL orthologous group. Members of this module are all assigned to untrusted orthologous groups, therefore this filter removes the entire module.

### Inparalogs

We remove orthologous groups which are part of the 50% of orthologous groups with most inparalogs. All orthologous groups associated with this module belong to this top 50% and therefore the filter removes the entire module.

### Multifunctional proteins

Protein SFA1 is also involved in other pathways in the GSD dataset: the glutathione dependent formaldehyde oxidation II pathway and leucine, isoleucine, phenylalanine and tryptophan degradation. Removal of this protein does improve the raw score ((15,3) instead of (13,3)) and the cohesiveness score relative to the random background is higher: 0.97 instead of 0.9.

## References

- Byrne K.P., Wolfe K.H. 2005. The Yeast Gene Order Browser: combining curated homology and syntenic context reveals gene fate in polyploid species. *Genome Res.* **15**: 1456-61
- Finn R.D., Tate J., Mistry J., Coghill P.C., Sammut J.S., Hotz H.R., Ceric G., Forslund K., Eddy S.R., Sonnhammer E.L. et al. 2008. The Pfam proteins database. *Nucleic Acids Research* **36**:D281-D288
- Gavin AC., Aloy P., Grandi P., Krause R., Boesche M., Marzioch M., Rau C., Jensen L.J., Bastuck S., Dümpelfeld B. et al. 2006. Proteome survey reveals modularity of the yeast cell machinery. *Nature* **440**: 631-636.
- Grandi P., Schlaich N., Tekotte H., Hurt E.C.. 1995. Functional interaction of Nic96p with a core nucleoporin complex consisting of Nsp1p, Nup49p and a novel protein Nup57p. *EMBO J.* **14**:76-87
- Grandi P., Emig S., Weise C., Hucho F., Pohl T., Hurt E.C. 1995. A novel nuclear pore protein Nup82p which specifically binds to a fraction of Nsp1p. *J. Cell. Biol.* **130**:1263-73
- Saccharomyces* Genome Database <ftp://ftp.yeastgenome.org/yeast/> June 2008
- Schrader N., Stelter P., Flemming D., Kunze R, Hurt E., Vetter I.R. 2008. Structural basis of the nic96 subcomplex organization in the nuclear pore channel. 2008. *Mol. Cell.* **29**:46-55
- Yao W., Lutzmann M., Hurt E. 2008. A versatile interaction platform on the Mex67-Mtr2 receptor creates an overlap between mRNA and ribosome export. *EMBO J.* **27**:6-16
