# Supplementary material for: Cohesive versus Flexible Evolution of Functional Modules in Eukaryotes
Source: PLoS Comput Biol. 2009 Jan 30;5(1):e1000276. doi: 10.1371/journal.pcbi.1000276 (PMC2615111; doi:10.1371/journal.pcbi.1000276)
Supplement: Table S2 — Overrepresented Gene Ontology Molecular Function categories (0.01 MB XLS) [file pcbi.1000276.s002.xls]

## Sheet: Gene Ontology Molecular Functio
Supplementary Table S2:
overrepresented Gene Ontology Molecular Function categories
Gene Ontology (GO) Molecular Function categories overrepresented in proteins in cohesive modules when compared to proteins in all modules.
GO-ID	p-value	corr p-value	# selected	# total	Description
3740	1.3674e-21	1.2143e-18	174	216	structural constituent of ribosome
16491	1.381e-19	6.1316e-17	144	175	oxidoreductase activity
16874	1.7271e-12	5.1122e-10	89	108	ligase activity
5198	7.8785e-12	1.749e-09	212	310	structural molecule activity
4812	1.4818e-11	1.8797e-09	36	36	aminoacyl-tRNA ligase activity
16875	1.4818e-11	1.8797e-09	36	36	ligase activity, forming carbon-oxygen bonds
16876	1.4818e-11	1.8797e-09	36	36	ligase activity, forming aminoacyl-tRNA and related compounds
45182	2.5646e-09	2.8467e-07	42	46	translation regulator activity
16614	1.5061e-08	1.486e-06	51	60	oxidoreductase activity, acting on CH-OH group of donors
3824	1.9966e-08	1.773e-06	696	1237	catalytic activity
8135	6.4359e-08	5.1504e-06	34	37	translation factor activity, nucleic acid binding
16616	6.96e-08	5.1504e-06	46	54	oxidoreductase activity, acting on the CH-OH group of donors, NAD or NADP as acceptor
15078	5.5987e-06	0.00038244	24	26	hydrogen ion transporter activity
30515	1.0378e-05	0.00065827	23	25	snoRNA binding
3745	1.9172e-05	0.001135	22	24	translation initiation factor activity
16879	5.27e-05	0.0029249	44	58	ligase activity, forming carbon-nitrogen bonds
19829	6.4847e-05	0.0033873	14	14	cation-transporting ATPase activity
16903	7.728e-05	0.0037134	17	18	oxidoreductase activity, acting on the aldehyde or oxo group of donors
16829	7.9454e-05	0.0037134	48	65	lyase activity
15077	9.6225e-05	0.0042724	24	28	monovalent inorganic cation transporter activity
46961	0.00012942	0.005224	13	13	hydrogen-transporting ATPase activity, rotational mechanism
16645	0.00012942	0.005224	13	13	oxidoreductase activity, acting on the CH-NH group of donors
16835	0.00048644	0.018399	21	25	carbon-oxygen lyase activity
16646	0.00051501	0.018399	11	11	oxidoreductase activity, acting on the CH-NH group of donors, NAD or NADP as acceptor
16620	0.00051799	0.018399	14	15	oxidoreductase activity, acting on the aldehyde or oxo group of donors, NAD or NADP as acceptor
46912	0.0010268	0.035069	10	10	transferase activity, transferring acyl groups, acyl groups converted into alkyl on transfer
16765	0.001238	0.040718	23	29	transferase activity, transferring alkyl or aryl (other than methyl) groups
4842	0.0013317	0.042234	21	26	ubiquitin-protein ligase activity
